# Supplementary material for: Probing the energy levels of perovskite solar cells via Kelvin probe and UV ambient pressure photoemission spectroscopy
Source: Royal Society of Chemistry journal article supplement (doi:10.1039/c6cp02446g), 2016-01-01
Supplement: c6cp02446g1.pdf [file c6cp02446g1.pdf]

# Probing the Energy Levels of Perovskite Solar Cells via Kelvin Probe and UV Ambient Pressure Photoemission Spectroscopy – Supplementary Information

J. R. Harwell<sup>1</sup>, T. Baikie<sup>3</sup>, I. Baikie<sup>3</sup>, J. L. Payne<sup>2</sup>, C. Ni<sup>2</sup>, J. T. S Irvine<sup>2</sup>, G. A. Turnbull<sup>1</sup>, I. D. W. Samuel<sup>1</sup>

1. Organic Semiconductor Centre, SUPA, School of Physics and Astronomy, University of St Andrews, North Haugh, St Andrews, Fife KY16 9SS, UK

2. EaSTChem, School of Chemistry, St Andrews University, North Haugh, St Andrews University, KY16 9SS

3. KP Technology, Burn Street, Wick, Caithness, KW1 5EH

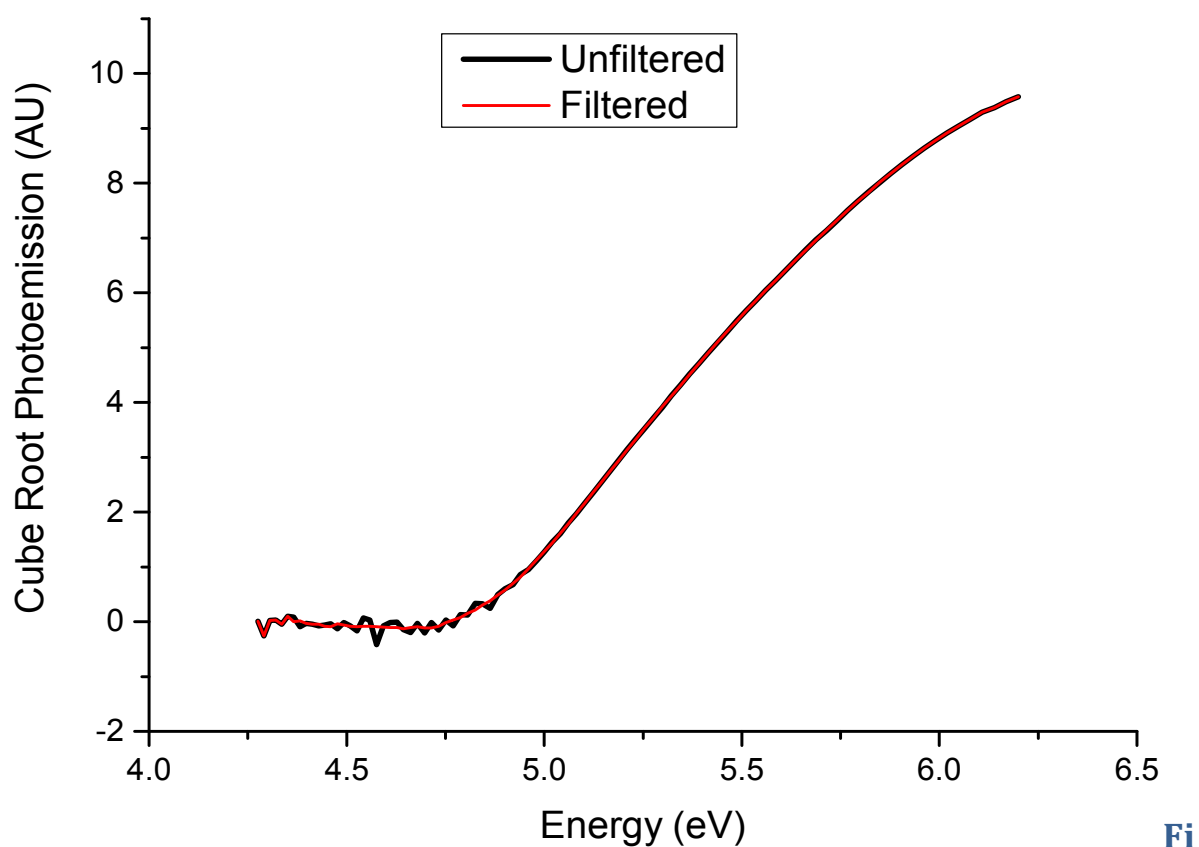

**g. S1. A plot showing a comparison of raw photoemission data and data passed through a Savitzky-Golay filter**

**Fi**
